# Supplementary material for: SEC-seq: association of molecular signatures with antibody secretion in thousands of single human plasma cells
Source: Springer Nature journal article supplement (doi:10.1038/s41467-023-39367-8), 2023-06-15
Supplement: MOESM1 [file 41467_2023_39367_MOESM1_ESM.pdf]

## SUPPLEMENTARY INFORMATION

### AUTHORS LIST

Rene Yu-Hong Cheng<sup>\*1,2</sup>, Joseph de Rutte<sup>\*3,4</sup>, Cade Ellis K Ito<sup>1,5</sup>, Andee R. Ott<sup>1</sup>, Lucie Bosler<sup>3</sup>, Wei-Ying Kuo<sup>3</sup>, Jesse Liang<sup>3</sup>, Brian E Hall<sup>6</sup>, David J Rawlings<sup>1,7,8</sup>, Dino Di Carlo<sup>\*\*3,4,9,10</sup>, Richard G. James<sup>\*\*1,2,5,8,11,12</sup>

### AFFILIATIONS

<sup>1</sup>Center of immunotherapy and Immunity, Seattle Children Research Institute, Seattle, WA 98101, USA,

<sup>2</sup>Molecular Engineering and Science Institute, University of Washington, Seattle, WA 98195, USA,

<sup>3</sup>Partillion Bioscience, Los Angeles, CA 90095, USA,

<sup>4</sup>Department of Bioengineering, University of California - Los Angeles, Los Angeles, CA 90095, USA,

<sup>5</sup>Department of Lab Medicine and Pathology, University of Washington, Seattle, WA 98195, USA,

<sup>6</sup>Luminex corporation, Seattle, WA 98119,

<sup>7</sup>Department of Immunology, University of Washington, Seattle, WA 98195, USA,

<sup>8</sup>Departments of Pediatrics, University of Washington, Seattle, WA 98195, USA,

<sup>9</sup>Department of Mechanical and Aerospace Engineering, Los Angeles, CA 90095, USA,

<sup>10</sup>California NanoSystems Institute (CNSI), University of California - Los Angeles, Los Angeles, CA 90095, USA,

<sup>11</sup>Department of pharmacology, University of Washington, Seattle, WA 98195, USA,

<sup>12</sup>Brotman-Baty Institute for Precision Medicine, Seattle, WA, 98195, USA.

\*Contribute equally to this study.

\*\*Corresponding authors: rickerj@u.washington.edu, dicarlo@ucla.edu

Supplementary Table 1. Buffer and reagents

Supplementary Table 2. Antibodies

Supplementary Table 3. ImageStreamX® MKII fluorochrome layout

Supplementary Table 4. ImageStreamX® MKII Collection Information

Supplementary Figures 1-13

### Supplementary Table 1. Buffer and reagents

| Buffer/Medium           | Item                                                                              | Vendor            | Catalog     | Concentration |
|-------------------------|-----------------------------------------------------------------------------------|-------------------|-------------|---------------|
| Washing buffer          | DPBS                                                                              | Fisher Scientific | 14190250    |               |
|                         | BSA                                                                               | VWR life science  | 0332-100G   | 0.50%         |
|                         | Pluronic F-127                                                                    | Sigma             | P2443-250G  | 0.05%         |
| Staining buffer         | DPBS                                                                              | Fisher Scientific | 14190250    |               |
|                         | FBS                                                                               | Sigma             | F0926-500ML | 2%            |
|                         | Pluronic F-127                                                                    | Sigma             | P2443-250G  | 0.05%         |
| Sorting Buffer          | PBS                                                                               | Cytiva            | SH30256.01  |               |
|                         | Blocker BAS (10%) in PBS                                                          | Thermo Scientific | 37525       | 1%            |
|                         | Pluronic F-127                                                                    | Sigma             | P2443-250G  | 0.05%         |
| B cell loading medium   | DMEM+GlutaMAX                                                                     | Gibco             | 10569-010   |               |
| B cell secretion medium | Lonza BioWhittaker Iscove's Modified Dulbecco's Medium (IMDM) without L-Glutamine | Fisher            | BW12726F    |               |
|                         | FBS                                                                               | Sigma             | F0926-500ML | 10%           |
|                         | GlutaMAX 100X                                                                     | Gibco             | 35050-061   | 1X            |
|                         | 2-Mercaptoethanol                                                                 | Fisher            | O3446I-100  | 55um          |

**Supplementary Table 2. Antibodies**

| <b>Experiment</b>                            | <b>Item</b>                                       | <b>Vendor</b>   | <b>Catalog</b> | <b>Clone</b> |
|----------------------------------------------|---------------------------------------------------|-----------------|----------------|--------------|
| human B cell capture antibody                | Biotin anti-human CD45 Antibody                   | Biolegend       | 304004         | HI30         |
| human B cell capture antibody                | Biotin anti-human CD38 Antibody                   | Biolegend       | 303518         | HIT2         |
| human B cell capture antibody                | Biotin anti-human CD27 Antibody                   | Biolegend       | 356426         | M-T271       |
| human B cell capture antibody                | Biotin anti-human CD31 Antibody                   | Biolegend       | 536604         | O92E4        |
| human IgG capture antibody/blocking antibody | Goat Anti-Human IgG Fc, Multi-Species SP ads-BIOT | Southen Biotech | 2014-08        | Polyclonal   |
| Flow Cytometry                               | PE-Cy7 anti-human CD19                            | Biolegend       | 302216         | HIB19        |
| Flow Cytometry                               | AF700 anti-human CD138                            | Biolegend       | 356512         | MI15         |
| Flow Cytometry/Amnis                         | PerCP-Cy5.5 anti-human CD38                       | BD              | BDB551400      | HIT2         |
| Flow Cytometry/Amnis                         | PE anti-human CD138                               | Biolegend       | 356504         | MI15         |
| Flow Cytometry/Amnis                         | PacBlue anti-human IgM                            | Biolegend       | 314514         | MHM-88       |
| Flow Cytometry                               | APC anti-human IgM                                | BD              | 551062         | G20-127      |
| Flow Cytometry                               | APC-Vio® 770 IgA Antibody, anti-human             | Miltenyi        | 130-113-473    | IS11-8E10    |
| Flow Cytometry                               | PE anti-human IgG                                 | BD              | 555787         | G18-144      |
| Flow Cytometry                               | AF700 anti-human IgG                              | BD              | 561296         | G18-145      |

|                  |                                                      |                            |                     |                |
|------------------|------------------------------------------------------|----------------------------|---------------------|----------------|
| Flow Cytometry   | APC anti-human CD59                                  | Biolegend                  | 304712              | p282           |
| Flow Cytometry   | FITC anti-human CD98                                 | Biolegend                  | 315603              | MEM-108        |
| Amnis            | APC anti-human IgG                                   | BD                         | 562025              | G18-145        |
| SEC-seq cross-sp | TotalSeq™-C0971 Streptavidin                         | Biolegend                  | 405271              |                |
| SEC-seq cross-sp | anti-mouse CD45                                      | R&D Systems                | AF114               | Polyclo<br>nal |
| SEC-seq cross-sp | Goat anti-Mouse IgG FC                               | Jackson Immuno<br>Research | 115-<br>065-<br>071 | Polyclo<br>nal |
| SEC-seq cross-sp | TotalSeq™-C1167 anti-mouse<br>IgG1 Antibody          | Biolegend                  | 406636              | RMG1-<br>1     |
| SEC-seq          | PE Mouse Anti-Human IgG                              | BD                         | 555787              | G18-<br>145    |
| SEC-seq          | TotalSeq™-B0911 anti-<br>phycoerythrin (PE) Antibody | Biolegend                  | 408113              | PE001          |

**Supplementary Table 3. ImageStreamX® MKII fluorochrome layout**

| Ch | Band    | Fluorochrome | Target      | Notes                                           |
|----|---------|--------------|-------------|-------------------------------------------------|
| 1  | 430-470 | Brightfield  | Morphology  | FIXED                                           |
| 2  | 470-560 |              |             |                                                 |
| 3  | 560-595 |              |             |                                                 |
| 4  | 595-660 | PE           | CD138       | Plasma cell marker                              |
| 5  | 660-745 | PerCP Cy5.5  | CD38        | Plasmablast/plasma cell marker                  |
| 6  | 745-785 | SSC          | Granularity |                                                 |
| 7  | 430-505 | Pac Blue     | IgM         | Surface bound, not captured on nanovial         |
| 8  | 505-575 |              |             |                                                 |
| 9  | 575-595 | Brightfield  | Morphology  | FIXED                                           |
| 10 | 595-660 |              |             |                                                 |
| 11 | 660-720 | APC          | IgG         | Antibody released to nanovial by plasma B cells |
| 12 | 720-785 |              |             |                                                 |

**Supplementary Table 4. ImageStreamX® MKII Collection Information**

|                        |                  |                   |                |
|------------------------|------------------|-------------------|----------------|
| Instrument: ISX<br>493 | 405 power: 120mw | 488 power: 400mW  | 560 power: Off |
| 592 power: Off         | 642 power: 150mW | 785 power: 2 mW   | Mag: 20x       |
| INSPIRE: Current       | Bin: None        | Core diameter: 10 | Velocity: 66   |
|                        |                  |                   | %Bd: 7         |



|                     |             |                   |                   |  |  |
|---------------------|-------------|-------------------|-------------------|--|--|
| CameraSync:<br>38.9 | Focus: 0.89 | Core Tracking: 11 | Focus Tracking: 0 |  |  |
|---------------------|-------------|-------------------|-------------------|--|--|

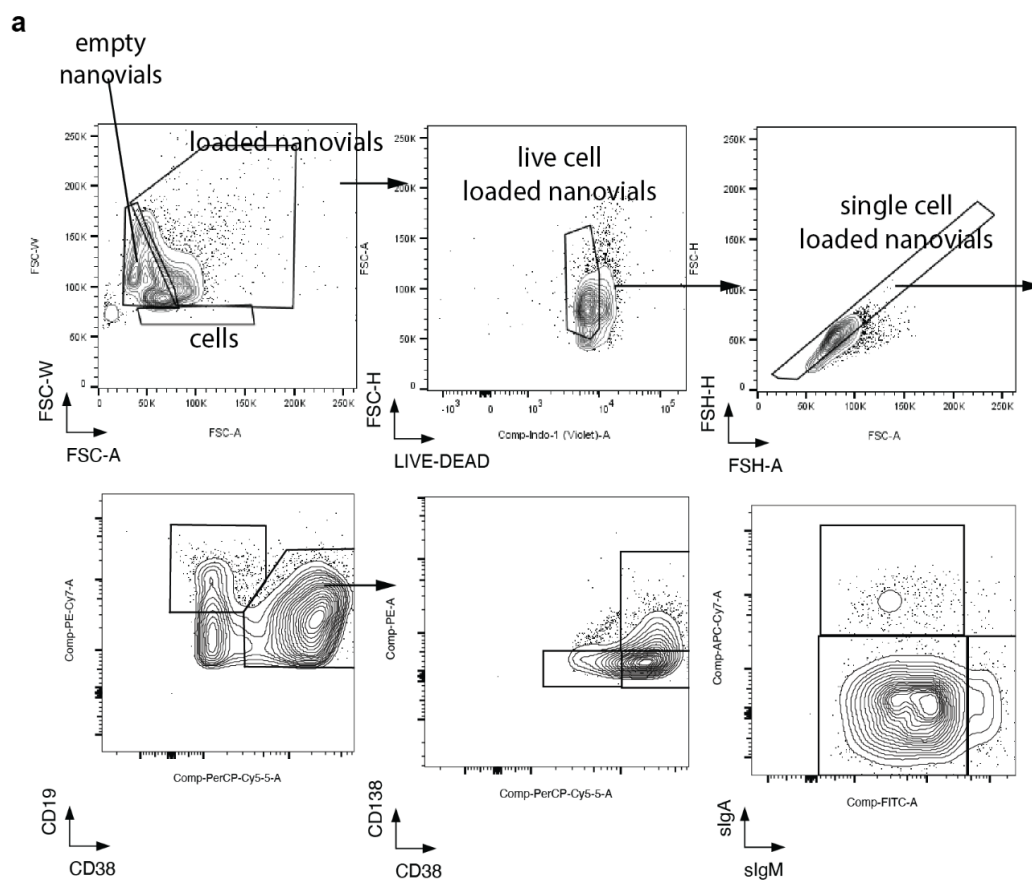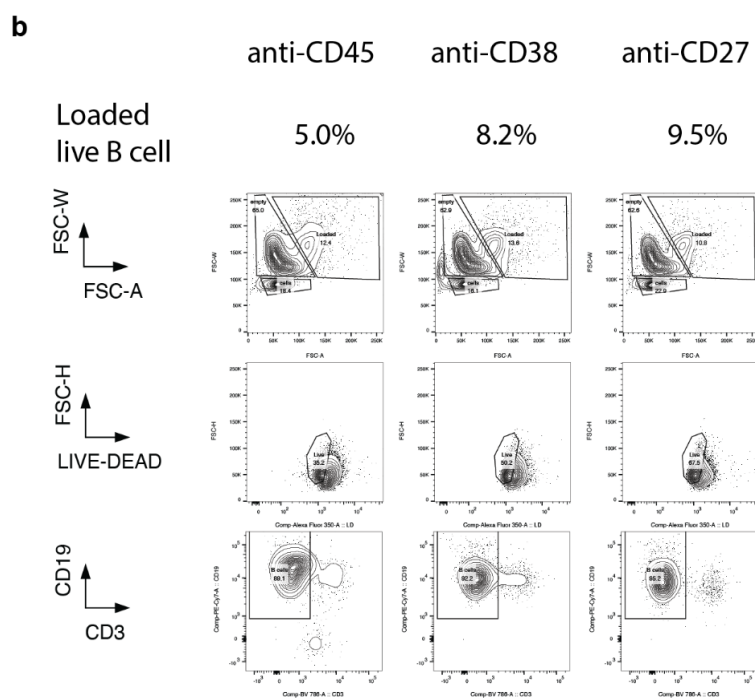

**Supplementary Figure 1. Nanovial secretion assay flow cytometry gating strategy and characterization of cell loading using antibodies against different cell surface markers.**

**(a)** Gating strategy for live B cell loaded nanovials used for surface marker and IgG secretion analysis. **(b)** Flow plots of cell loading with different cell capture antibodies linked to the nanovials. Loaded live B cell percentage is calculated by dividing the loaded live B cell counts by the total number of nanovial counts (loaded nanovial counts + empty nanovial counts).

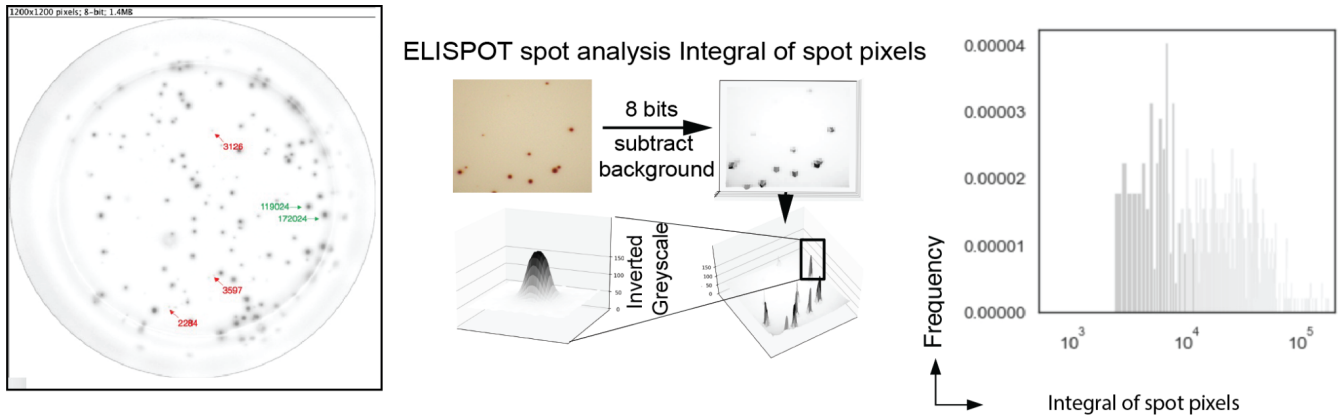

### Supplementary Figure 2. ELISPOT spot analysis and IgG secretion heterogeneity.

An ELISPOT image (left) showing IgG secretion for plasma cells following our differentiation protocol. Red arrows point to events with low IgG secretion (small faint spots) and green arrows point to events with higher IgG secretion (larger, more intense spots). The spot intensity is integrated over the entire spot area using ImageJ and the output histogram (right) represents the heterogeneous IgG secretion ability of the population.

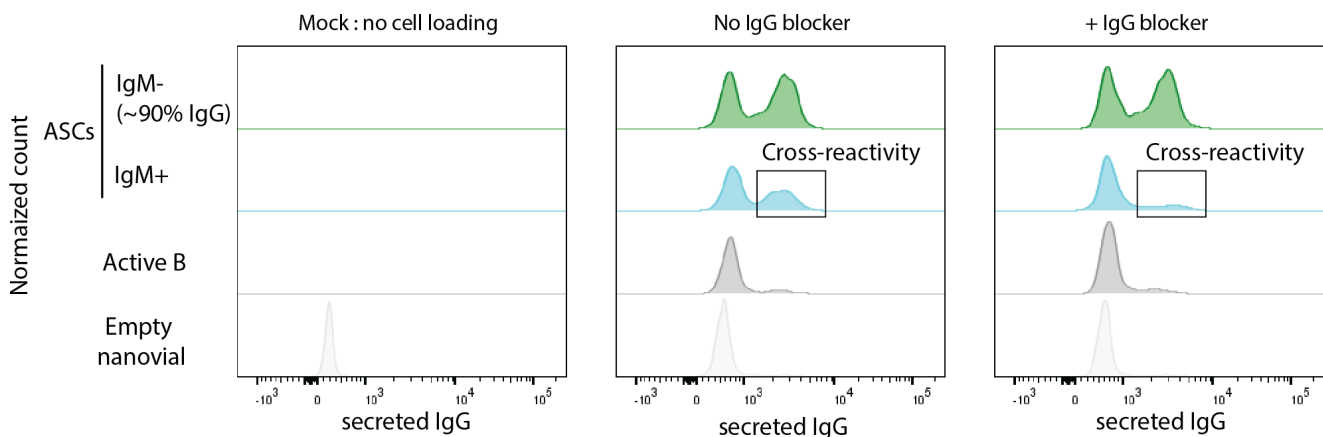

### Supplementary Figure 3. Nanovial secretion with or without anti-IgG blocking.

We adjusted the loading strategy to reduce cross-reactive IgG signal to nanovials containing IgM cells. In order to reduce cross-reactive cells are incubated with anti-IgG as a sink for secreted IgG during the cell loading step and then the anti-IgG solution is washed prior to the cell secretion incubation step.

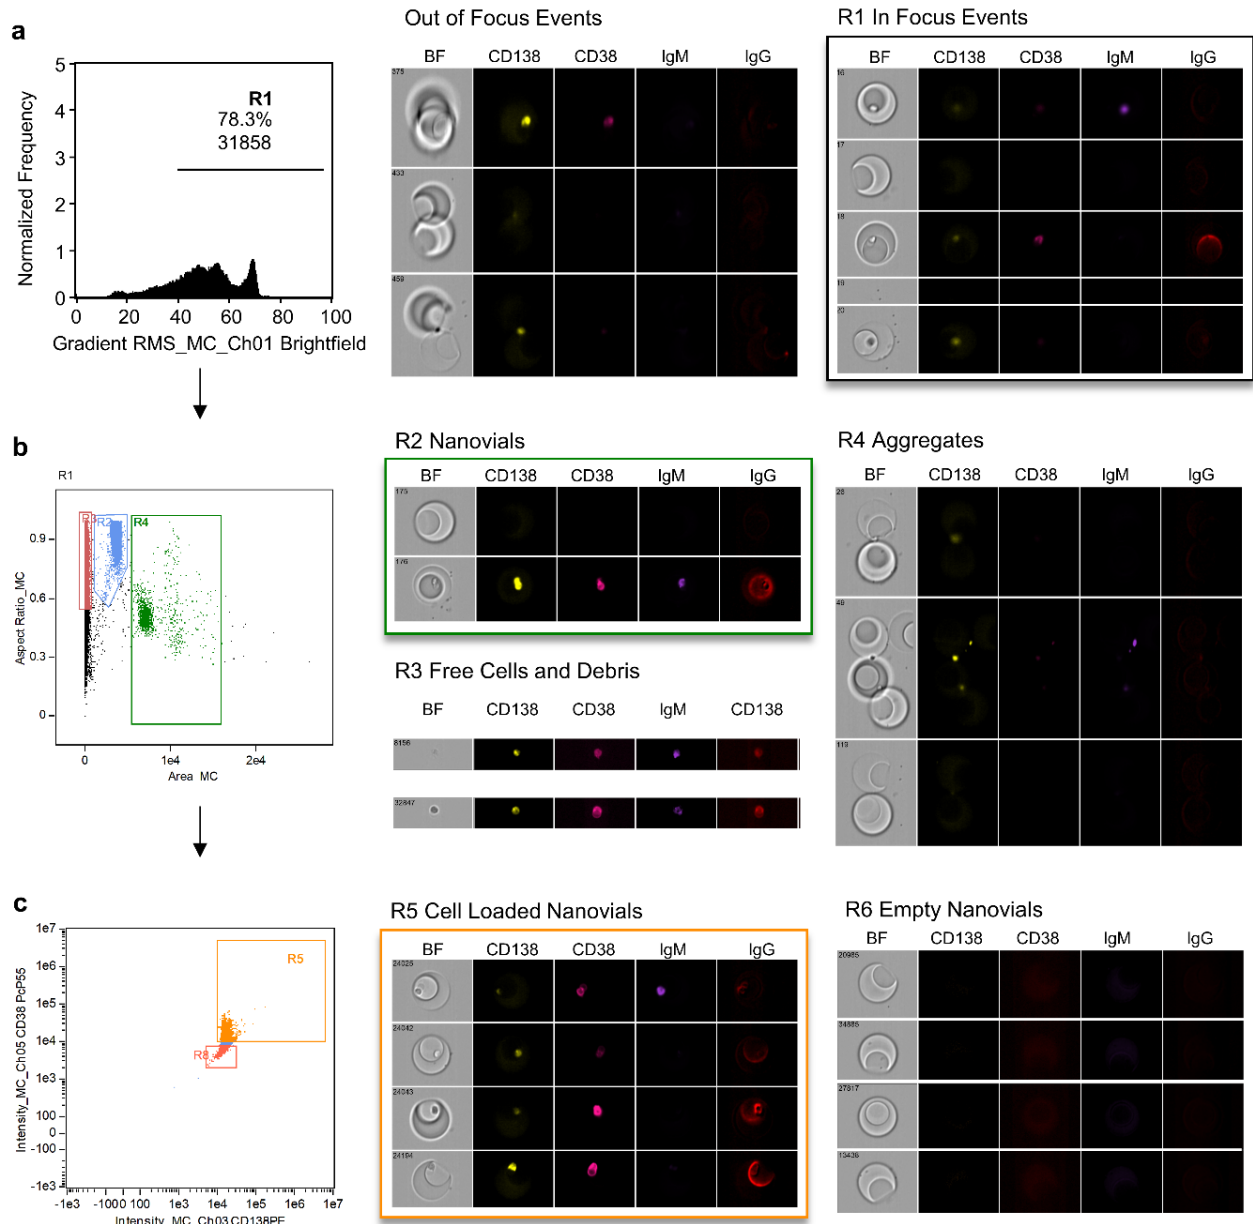

**Supplementary Figure 4. Nanovial secretion assay gating strategy on the ImageStreamX® MKII. (a)** Infocus events are identified by gating on the root mean square gradient of the brightfield channel (Gate R1). **(b)** Events associated with small debris, free cells, nanovials, and nanovial aggregates can be assigned based on the aspect ratio and area of the event. Gate R2 contains single nanovials. **(c)** Cell-loaded nanovials are then gated based on a threshold level of CD38 and CD138 signals (Gate R5).

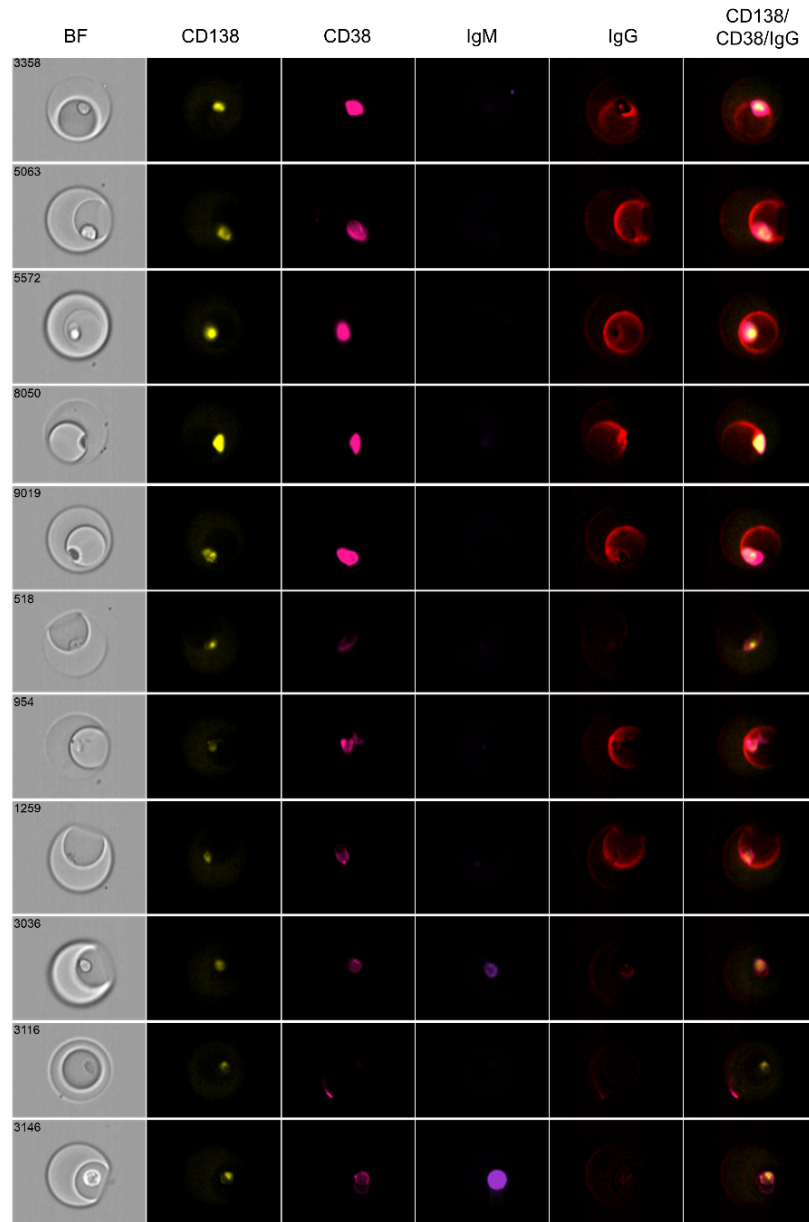

**Supplementary Figure 5. Additional images of cell loaded nanovials taken with the ImageStreamX® MKII.** Compared to the punctate cell surface signal for surface markers, the secreted IgG signal is clearly seen across the hemispherical cavity of the nanovial.

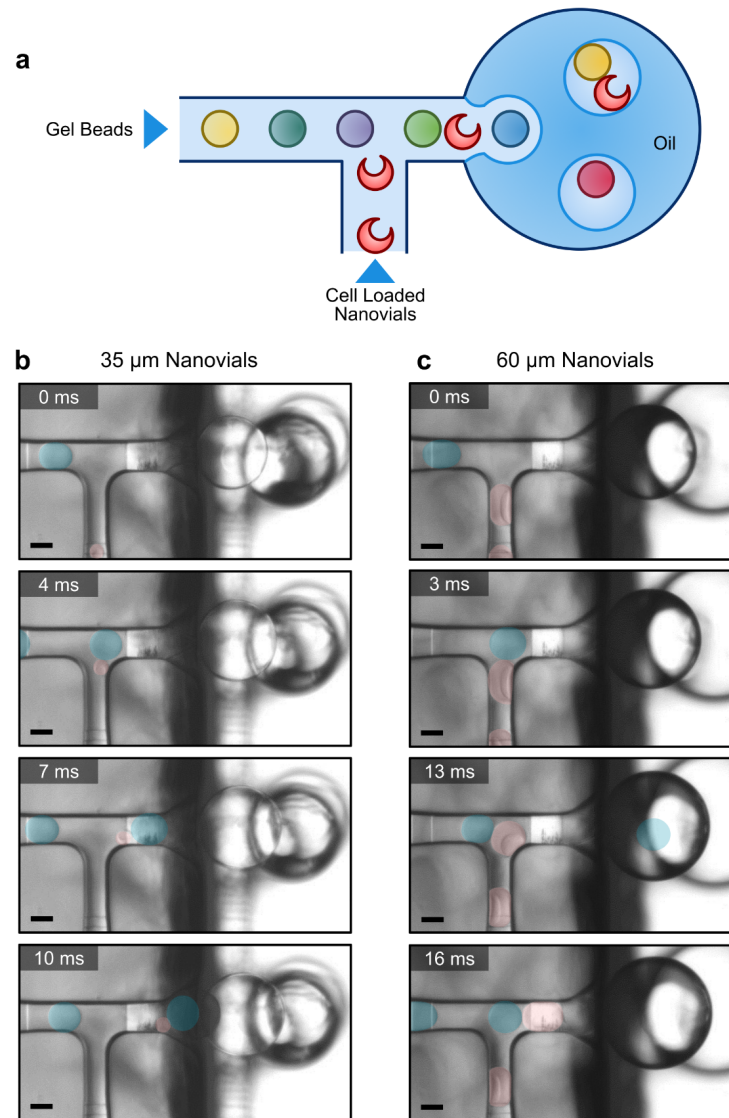

**Supplementary Figure 6. High-speed microscopy images of the 10X Genomics gel beads and nanovials loading into droplets formed on the 10X Next GEM chip G.** (a) Gel beads and nanovials are loaded through the gel bead inlet and cell sample inlets, respectively, as shown in the illustration. (b) 35  $\mu\text{m}$  outer diameter nanovials pass through the cell sample inlet without obstruction and load into forming droplets. (c) 60  $\mu\text{m}$  nanovials become constrained in the sample inlet and eventually pass through after deforming. Gel Beads and nanovials are false-colored blue and pink, respectively, to aid in visualization. Scale bar: 50  $\mu\text{m}$ .

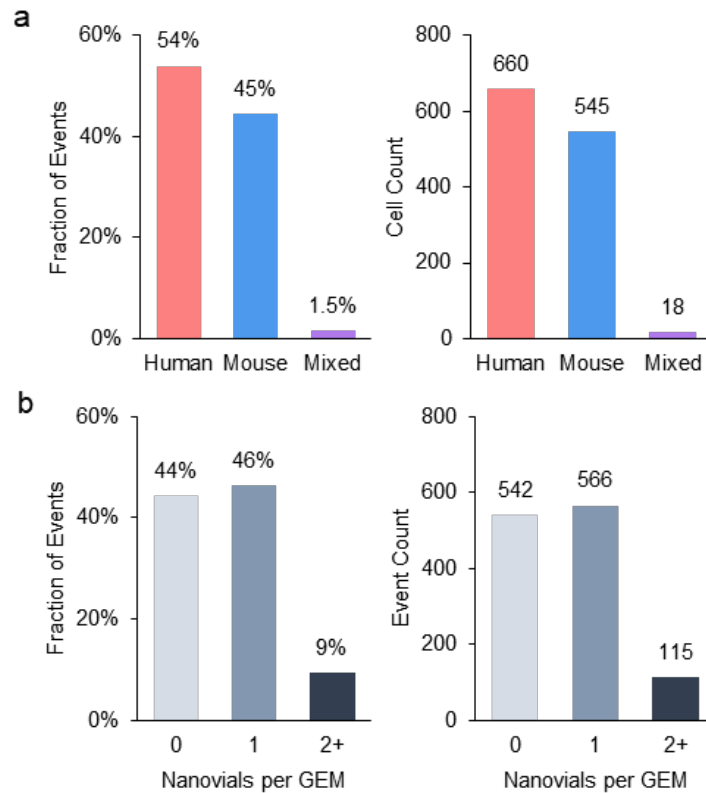

**Supplementary Figure 7. Statistics on multiplet events from the mixed species experiments shown in figure 3.** Nanovials were loaded into the 10X Chromium chip at the recommended concentration for cells to achieve 10,000 nanovial events. Approximately 10% of nanovials were loaded with cells and a roughly equal population of cells were off the nanovials. **(a)** The fraction of events based on species classification are plotted. The cell multiplet rate is close to the expected value reported in the 10X literature based on cell count (0.8% expected, 1.5% actual). **(b)** Fraction of events associated with 0, 1, or 2 or more nanovials. Using feature barcode reads on nanovials we discriminated the number of nanovials per cell event. Given there are ~10 times the number of nanovials as cells for this experiment the number of events with multiple nanovials are within the expected range (7.6% expected, 9% actual).



**a**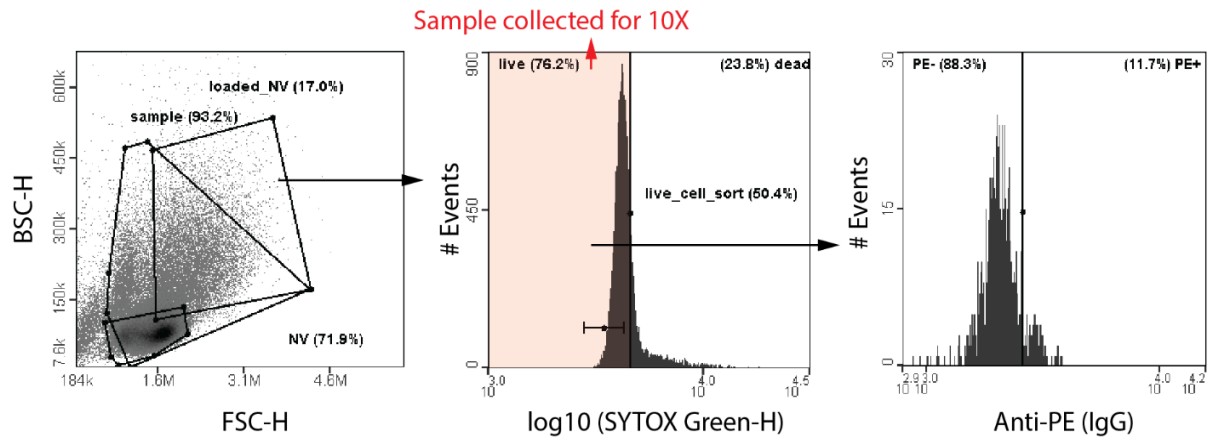**b**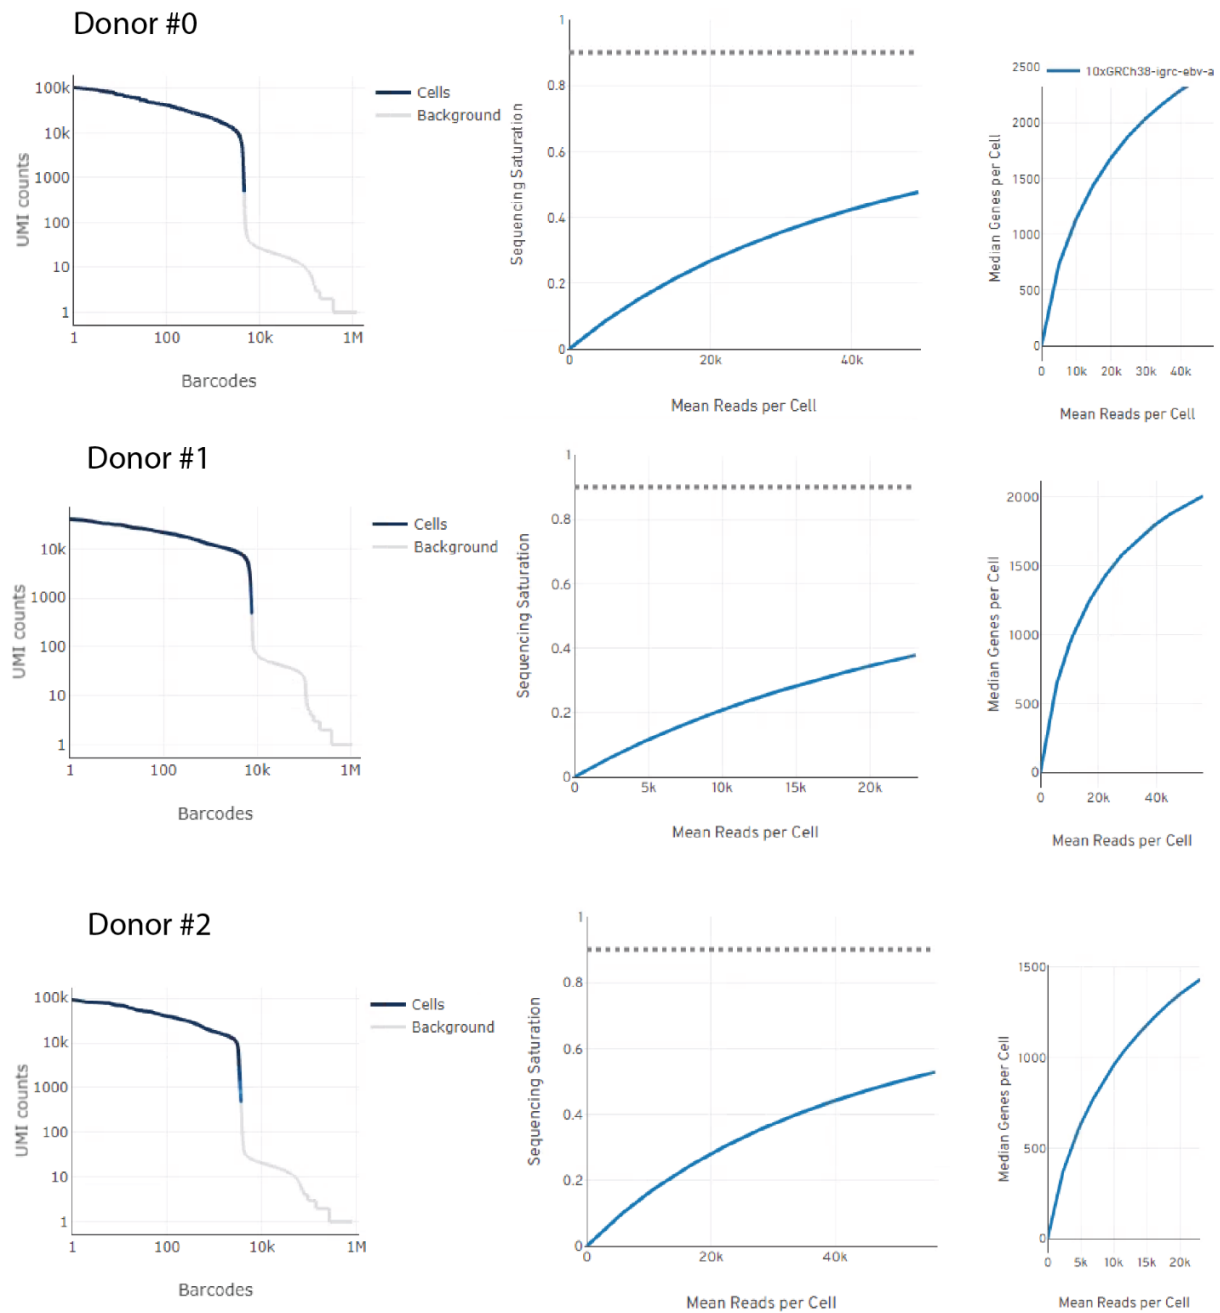

**Supplementary Figure 8. Sorting live-cell-containing nanovials for SEC-seq and Cell Ranger QC**

**(a)** Sorting strategy for live-cell-containing nanovials using the Nanocollect WOLF prior to loading into the 10X Chromium Next GEM chip. All live cells that were loaded on nanovials were collected independent of secretion amount. **(b)** 10X Cell Ranger QC summary from three donors (experiments). Barcode rank plot represents the UMI count separation between cells and background (left). Sequencing saturation plot shows the sequencing depth is ~50% by using a NextSeq 1000/2000 kit (middle).

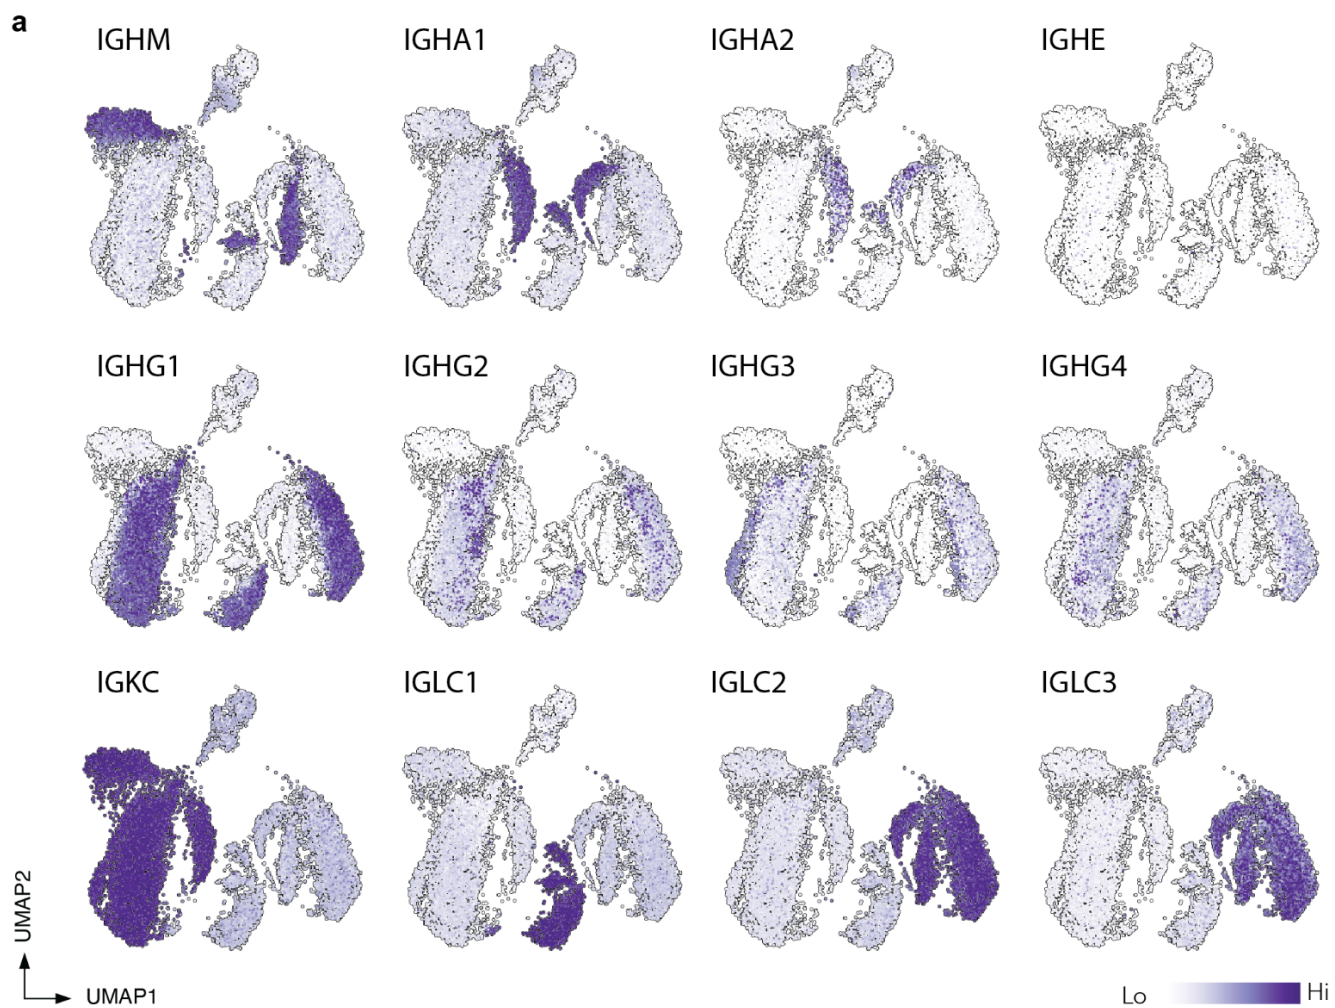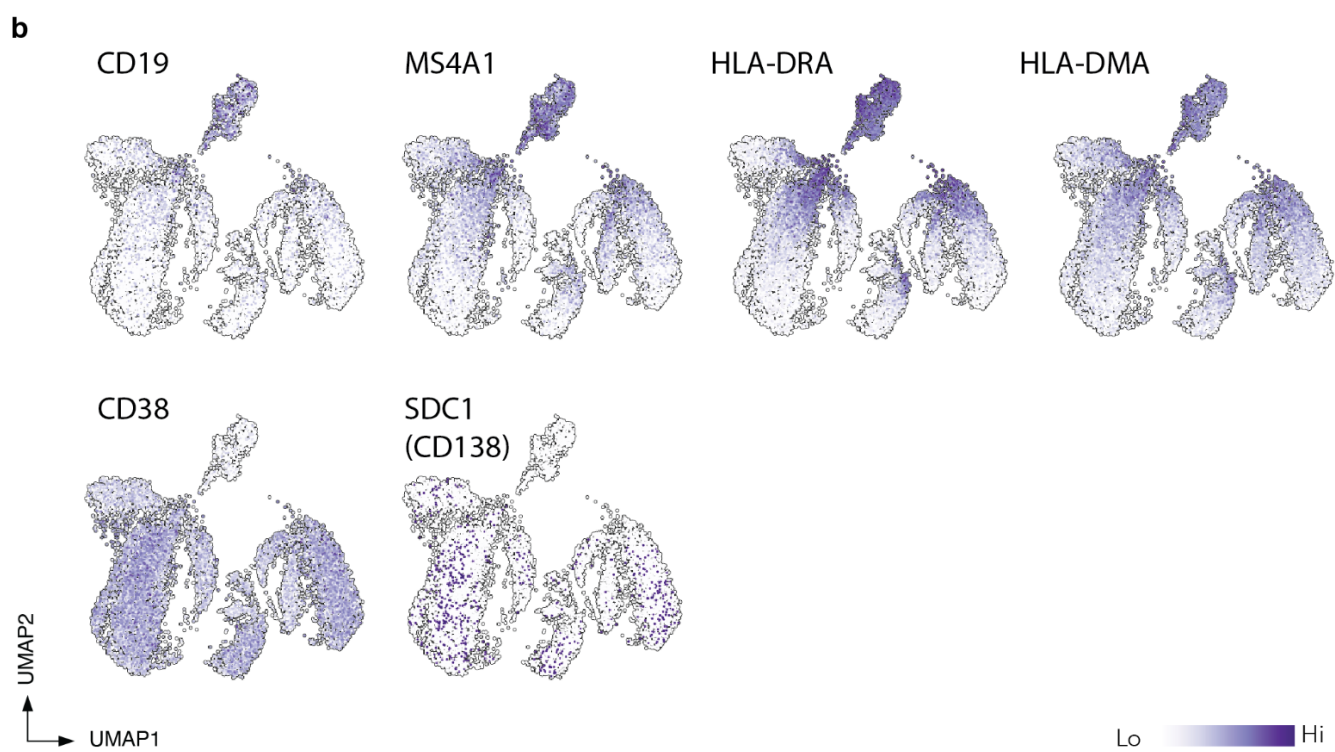

### Supplementary Figure 9. UMAP of immunoglobulins and activated B cells/PC makers.

Relative transcript levels of immunoglobulin genes projected on the UMAP plot from Fig 4b. **(a)** The top row represents non-IgG immunoglobulin classes, the middle row represents IgG subclasses, and the bottom row represents immunoglobulin light chain. **(b)** The top row represents activated B cell markers and the bottom row represents PC markers. All UMAP color bar are according to normalize expression data into unit of log transcripts.

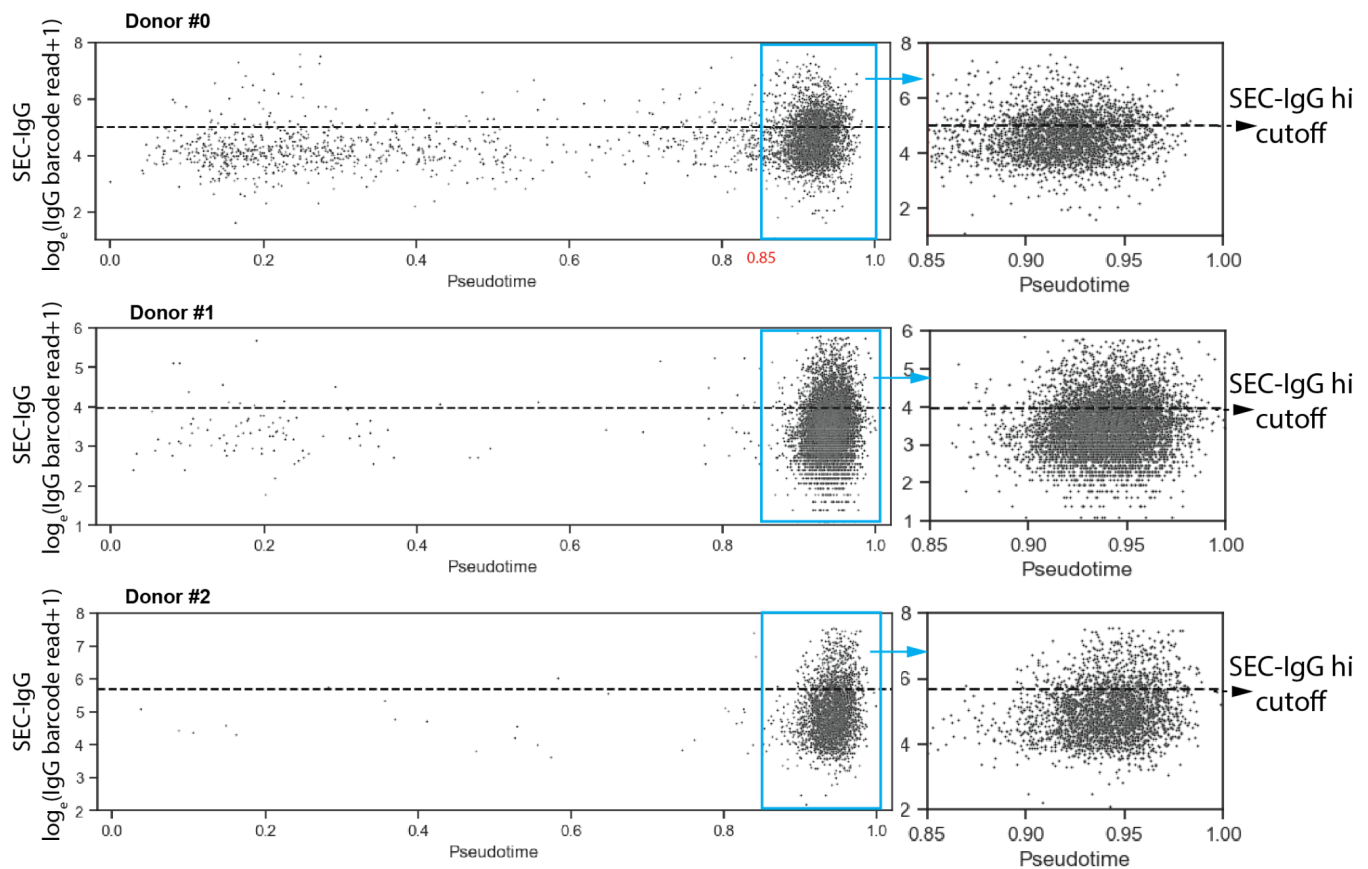

**Supplementary Figure 10. Scatter plot showing the SEC-IgG barcode reads for each cell as a function of pseudotime.** Data is plotted for each donor. The region above ~0.85 pseudotime contains the majority of cells and is expanded. Dash horizontal lines represent SEC-IgG hi cutoff from each donor.

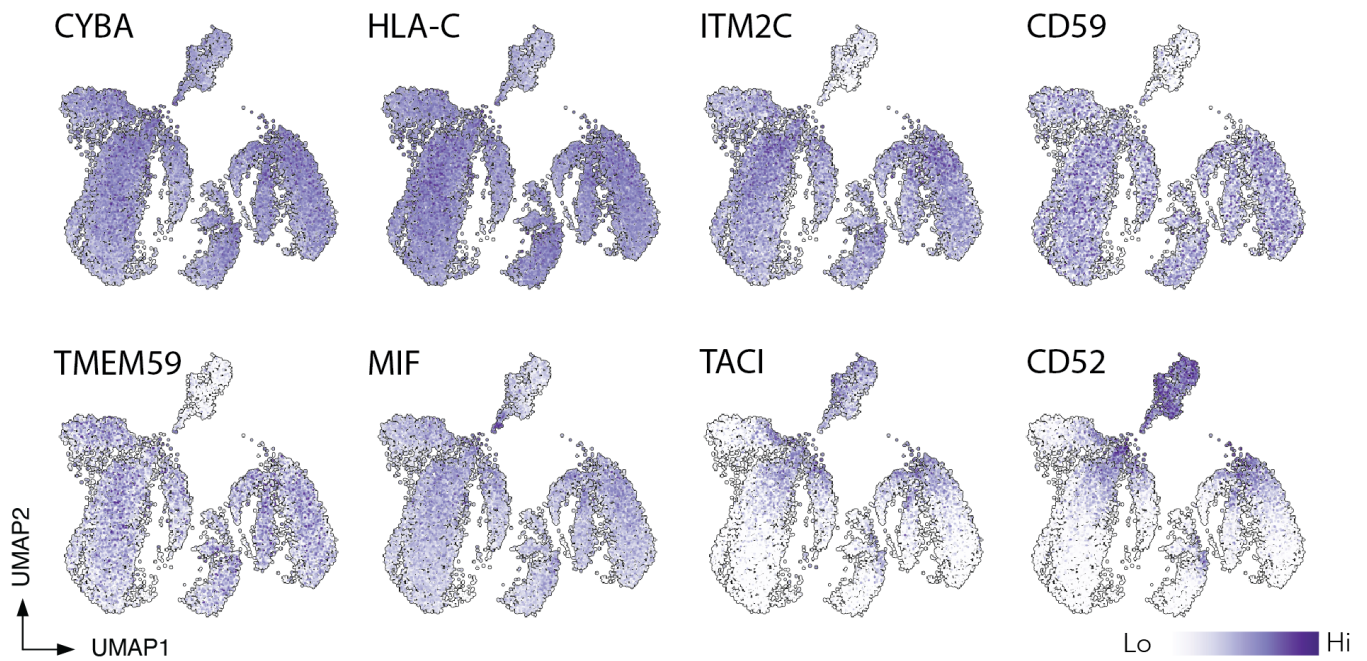

**Supplementary Figure S11. UMAP of surface expressed genes correlated with SEC-IgG.** Relative transcript levels of surface expressed genes projected on the UMAP plot from Fig 4b. All UMAP color bar are according to normalize expression data into unit of log transcripts.



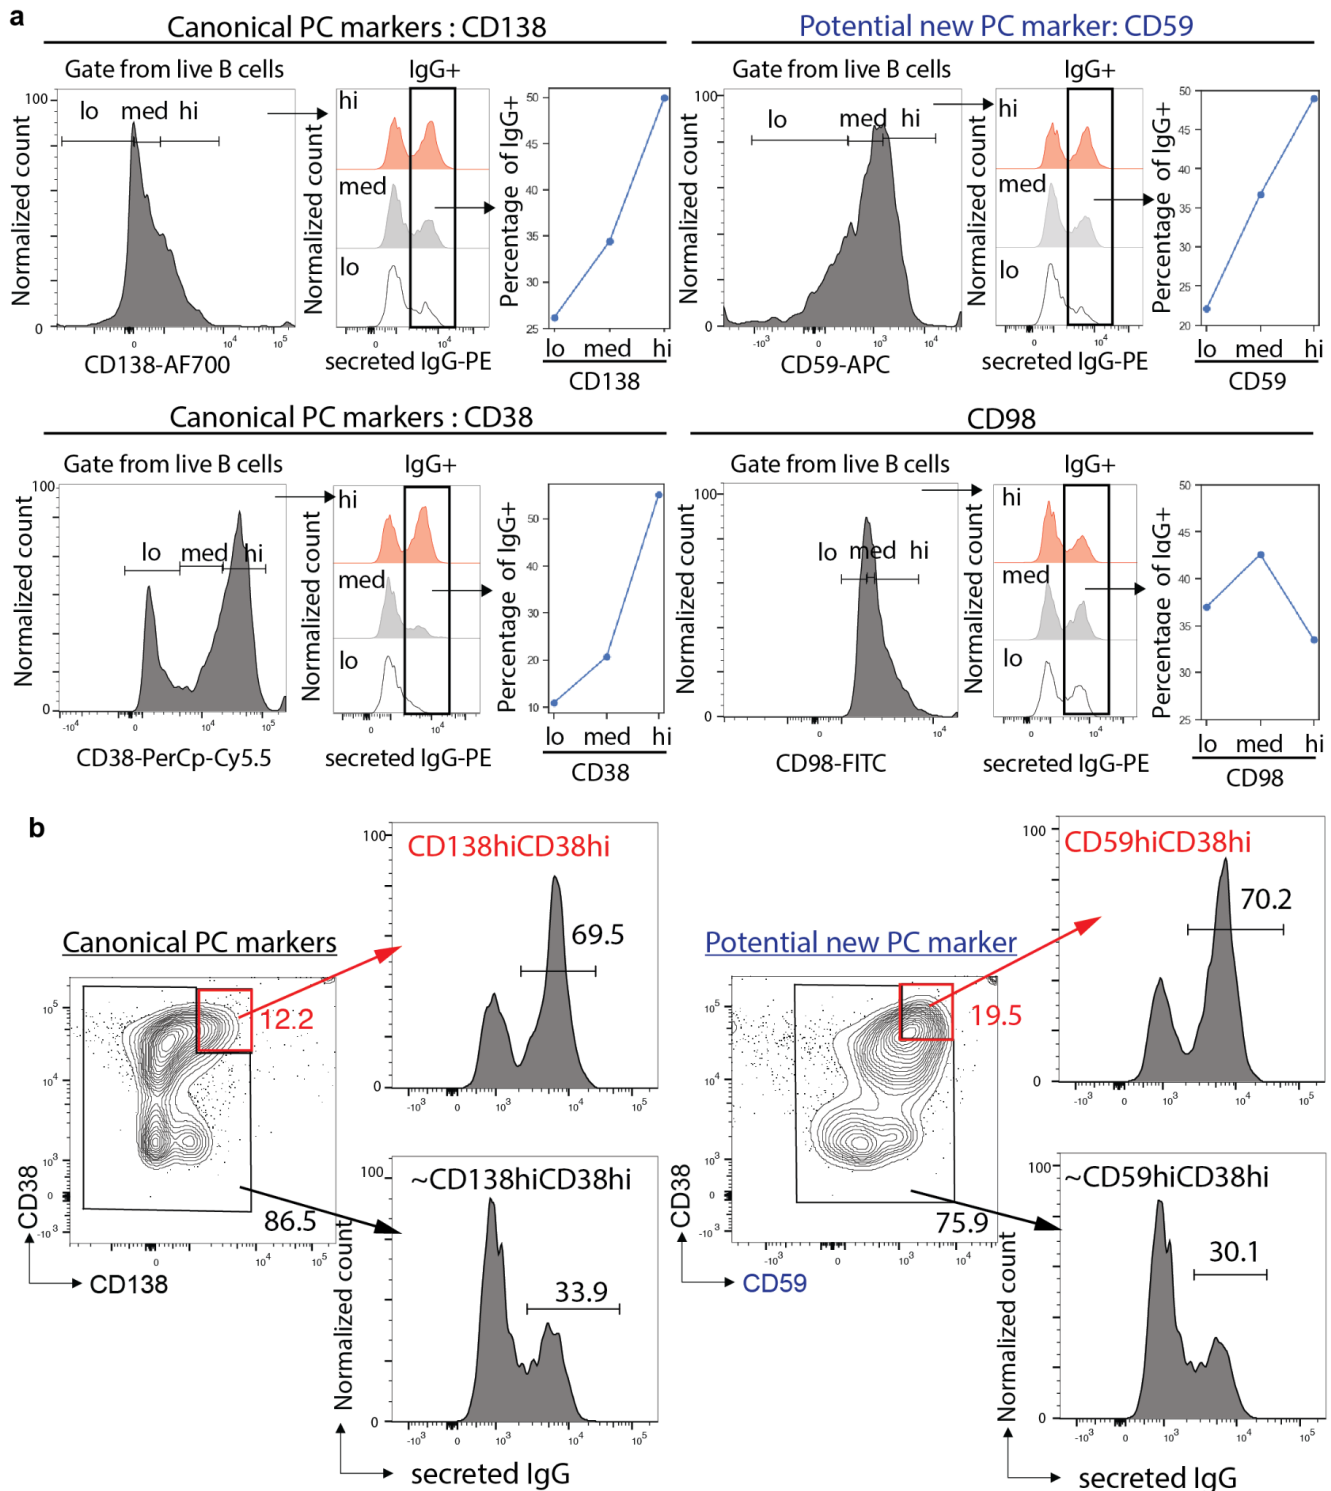

**Supplementary Figure 12. Flow cytometry validation for surrogate PC marker, CD59.** (a) Gating live B cells with low (lo), medium (med) and high (hi) expression of CD138, CD38, CD59 and CD98, and plot of percentage of IgG secretors from each gate. (b) Canonical gate for PC,

CD138<sup>hi</sup>CD38<sup>hi</sup> and histogram of secreted IgG from each indicated gate (left panel).  
Comparison with potential PC marker, CD59 (right panel).

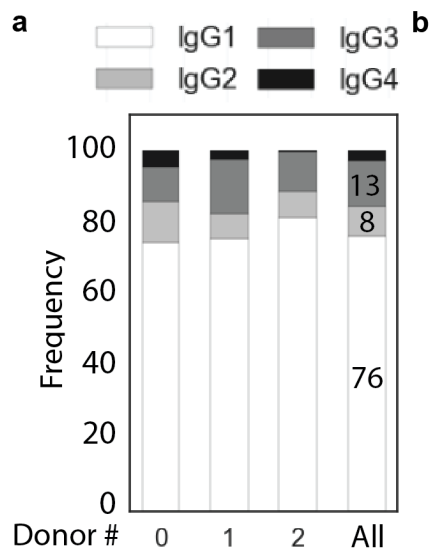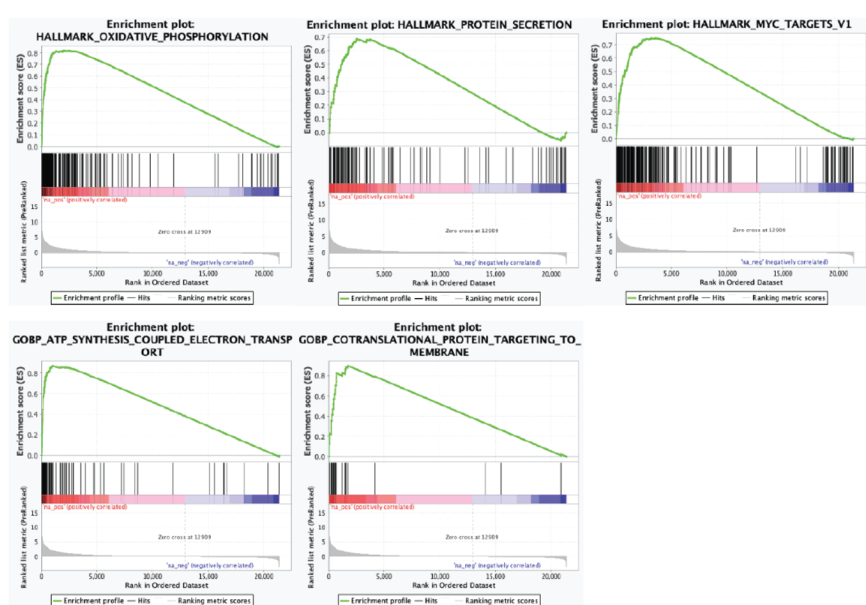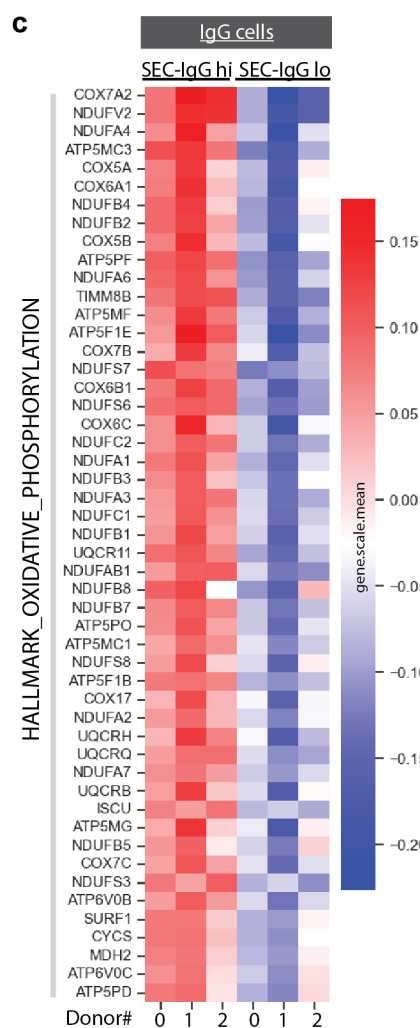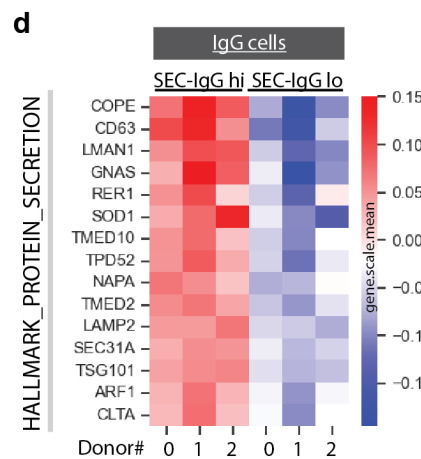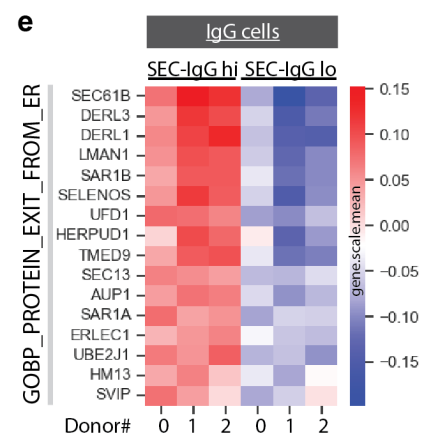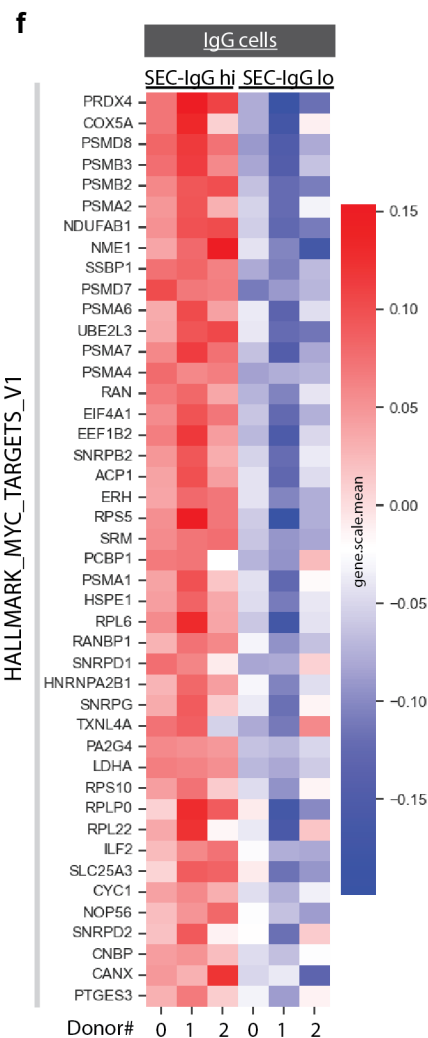



**Supplementary Figure 13. IgG isotypes and GSEA plot and gene list in core enrichment.**

**(a)** Bar graph representing the percentage of each isotype of IgG population from each donor (IgG1, IgG2, IgG3, and IgG4). **(b)** Representative GSEA plots of mitochondrial, protein transport and MYC-targets. **(c-f)** Top gene lists in core enrichment in **(c)** Hallmark oxidative phosphorylation, **(d)** Hallmark protein secretion **(e)** Biological process protein exit from ER, and **(f)** Hallmark MYC-targets. Heatmap represents the subgroup (SEC-IgG low, SEC-IgG high from IgG cells) mean of z-score of each gene expression from each donor.
